# Supplementary material for: Rutile TiO2 nanowire array infiltrated with anatase nanoparticles as photoanode for dye-sensitized solar cells: enhanced cell performance via the rutile–anatase heterojunction
Source: Royal Society of Chemistry journal article supplement (doi:10.1039/c2ta01432g), 2013-01-01
Supplement: c2ta01432g.pdf [file c2ta01432g.pdf]

## Electronic Supplementary Information

### **Rutile TiO<sub>2</sub> Nanowire Array Infiltrated with Anatase Nanoparticles as photoanode for Dye-Sensitized Solar Cell. Enhance Cell Performance via Rutile-Anatase Heterojunction**

*Panpan Sun, Xintong Zhang, \* Changhua Wang, Yongan Wei, Lingling Wang, Yichun Liu*

Center for Advanced Optoelectronic Functional Materials Research, and Key Laboratory for UV-Emitting Materials and Technology of Ministry of Education, Northeast Normal University,  
5268 Renmin Street, Changchun 130024, China

---

\* To whom correspondence should be addressed. Tel./Fax: +86-431-85099772; E-mail: xtzhang@nenu.edu.cn

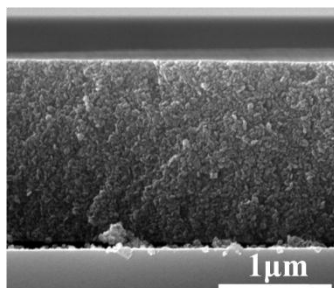

**Fig. S1** Cross-sectional SEM image of TiO<sub>2</sub> NPs spin coated on bare FTO substrate.

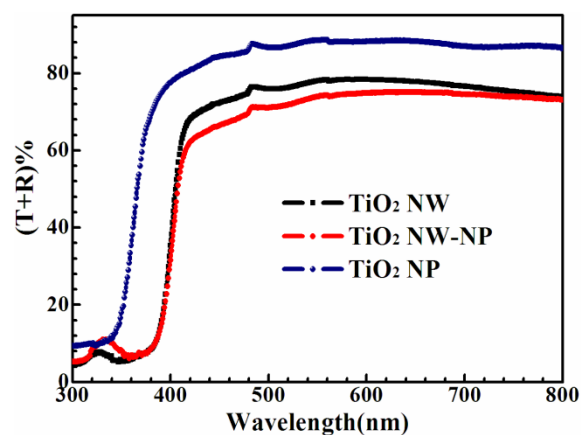

**Fig. S2** Sum of diffuse transmittance and reflectance spectra of bare TiO<sub>2</sub> NW, NW-NP and NP films.

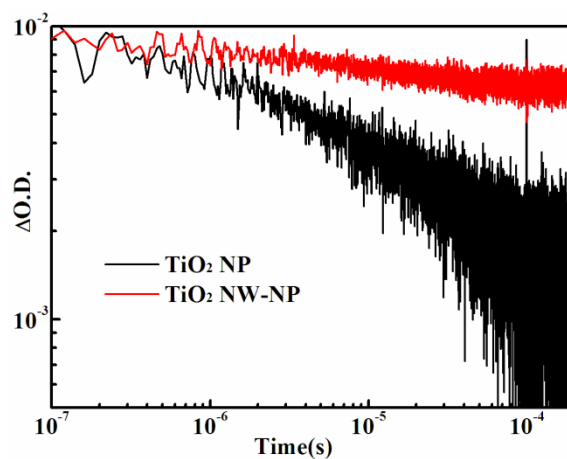

**Fig. S3** Transient absorption spectra of N719 dye loaded NP and NW-NP films by monitoring the decay of photoinduced absorption of dye cations.

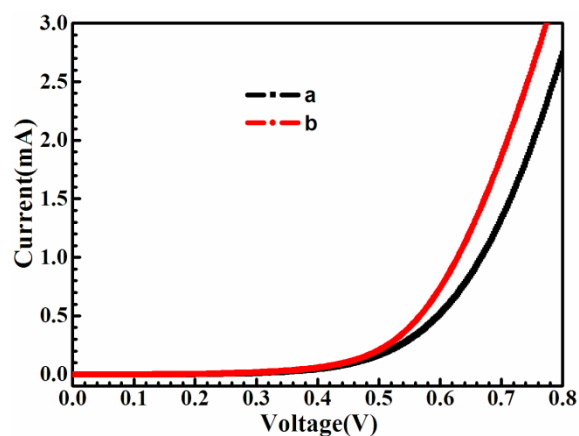

**Fig. S4** Dark I-V curves of FTO/electrolyte/Pt device, a bare FTO glass; b FTO glass hydrothermally reacted in hydrochloric acid and deionized water (1:1 by volume) at 423 K and kept constant temperature for 8 hrs.
